# Supplementary material for: Development of high-strength, tough, and self-healing carboxymethyl guar gum-based hydrogels for human motion detection
Source: Royal Society of Chemistry journal article supplement (doi:10.1039/c9tc05797h), 2019-12-20
Supplement: c9tc05797h3.pdf [file c9tc05797h3.pdf]

## Supporting Information

# Development of High-Strength, Tough, and Self-Healing Carboxymethyl Guar Gum-Based Hydrogels for Human Motion Detection

*Wei Chen*<sup>a,\*</sup>, *Yunhao Bu*<sup>a</sup>, *Delin Li*<sup>a</sup>, *Yuan Liu*<sup>a</sup>, *Guangxue Chen*<sup>b</sup>, *Xiaofang Wan*<sup>b</sup>,  
*Nan Li*<sup>a,\*</sup>

<sup>a</sup> College of Engineering, Qufu Normal University, Rizhao 276826, China

<sup>b</sup> State Key Laboratory of Pulp and Paper Engineering, South China University of  
Technology, Guangzhou 510640, China

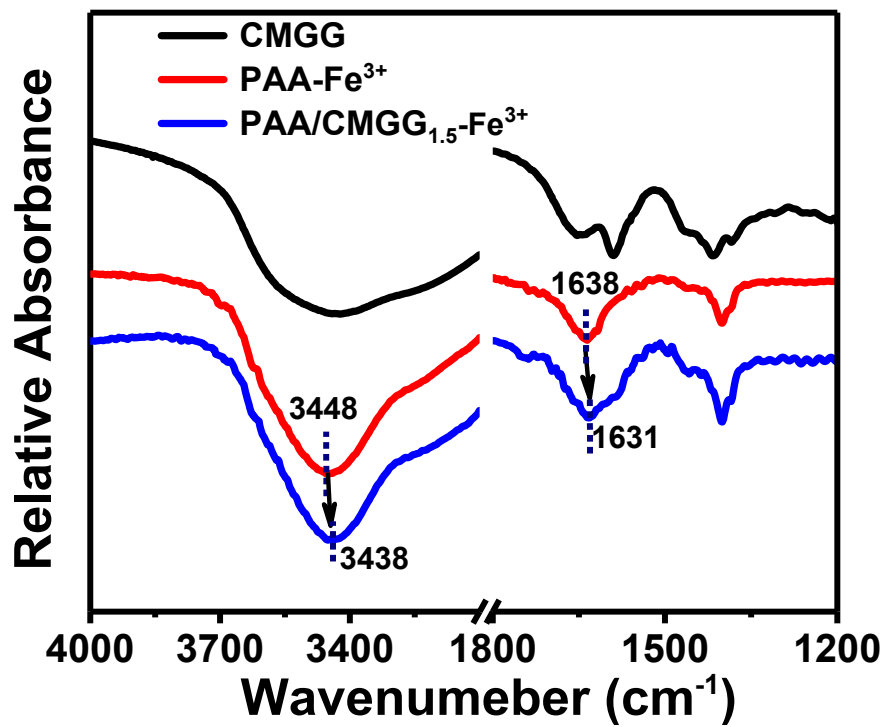

**Figure S1** FT-IR spectra of CMGG powder, PAA-Fe<sup>3+</sup>, and PAA/CMGG<sub>1.0</sub>-Fe<sup>3+</sup> hydrogels.

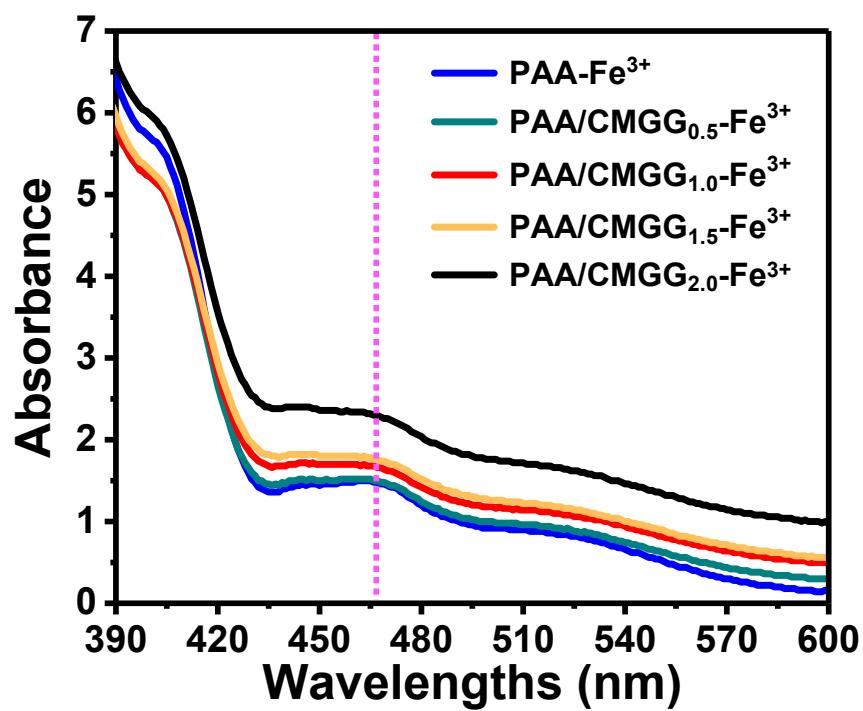

**Figure S2** UV-vis spectra of PAA-Fe<sup>3+</sup>, PAA/CMGG<sub>0.5</sub>-Fe<sup>3+</sup>, PAA/CMGG<sub>1.0</sub>-Fe<sup>3+</sup>, PAA/CMGG<sub>1.5</sub>-Fe<sup>3+</sup>, and PAA/CMGG<sub>2.0</sub>-Fe<sup>3+</sup> solutions.

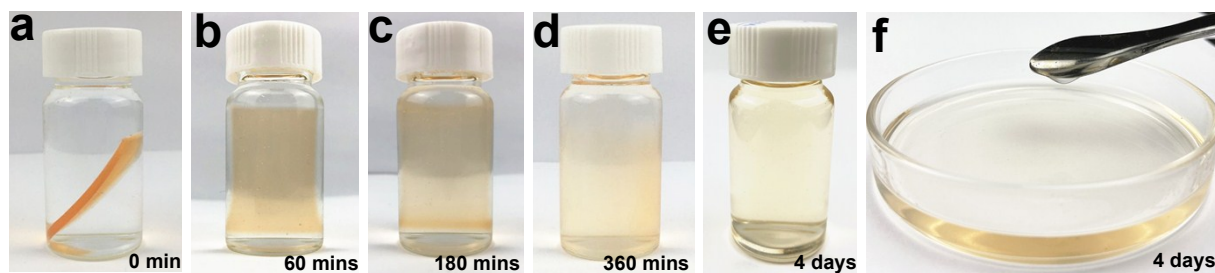

**Figure S3** a-f) A series of photos showing the progressive decomposition of the PAA/CMGG<sub>1.5</sub>-Fe<sup>3+</sup> hydrogel in water.
